# Supplementary material for: Mitochondrial stress activates YAP/TAZ through RhoA oxidation to promote liver injury
Source: PubMed Central journal article supplement (PMC10789791; doi:10.1038/s41419-024-06448-5), 2024-01-15

# Uncropped western blots

Figure 1E

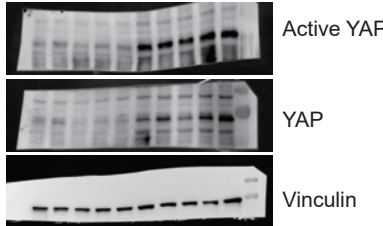

Figure 1F

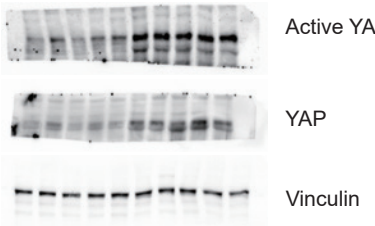

Figure 1G

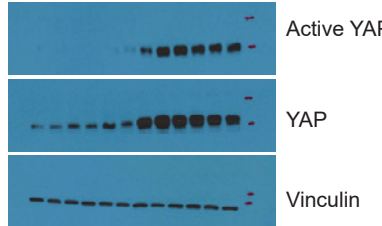

Figure 2D

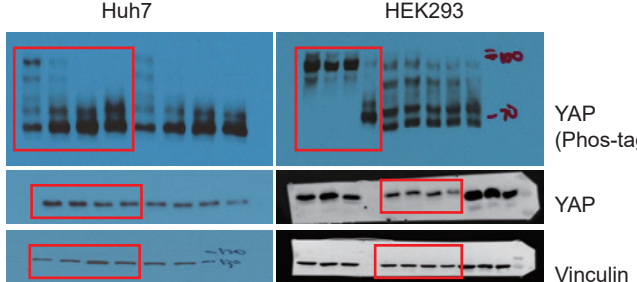

Figure 2E

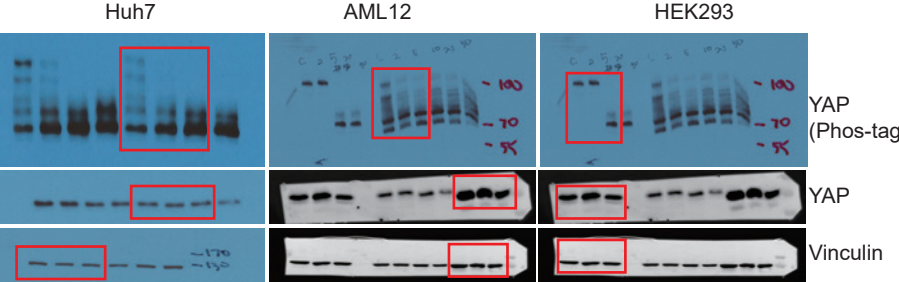

Figure 2F

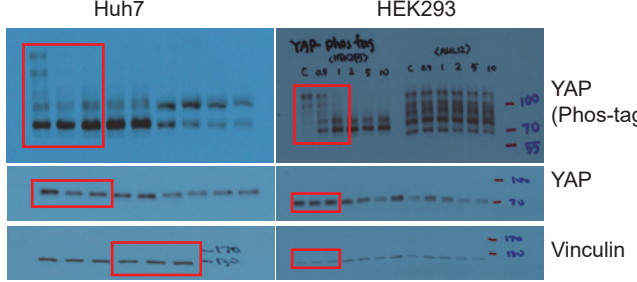

Figure 2G

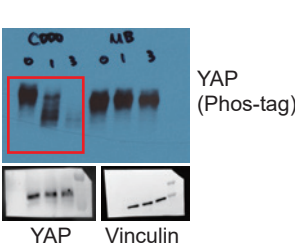

Figure 2H

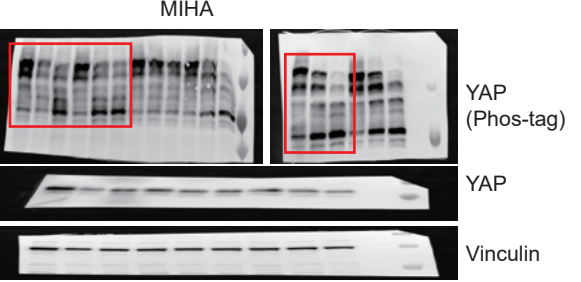

Figure 2H

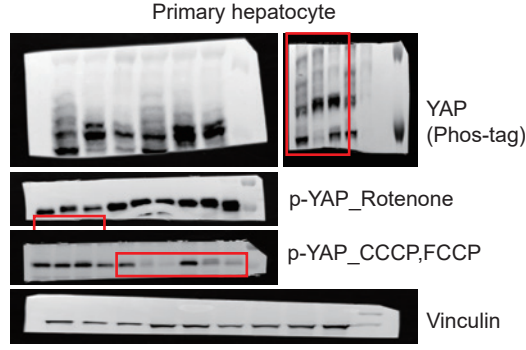

Figure 2K

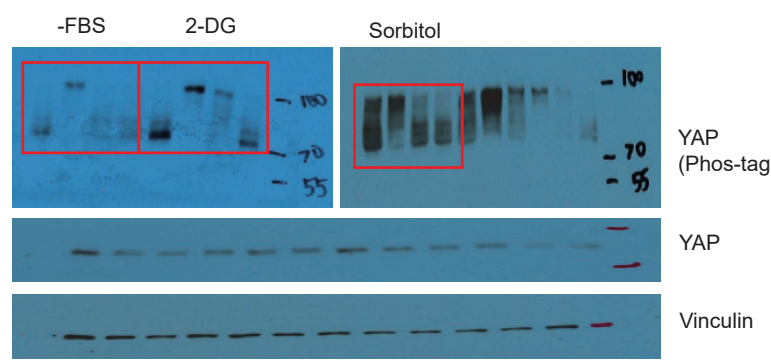

Figure 2K

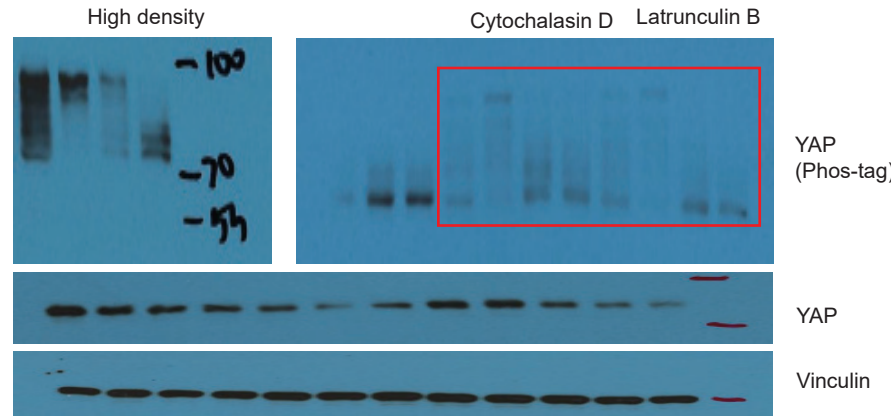

Figure 3B

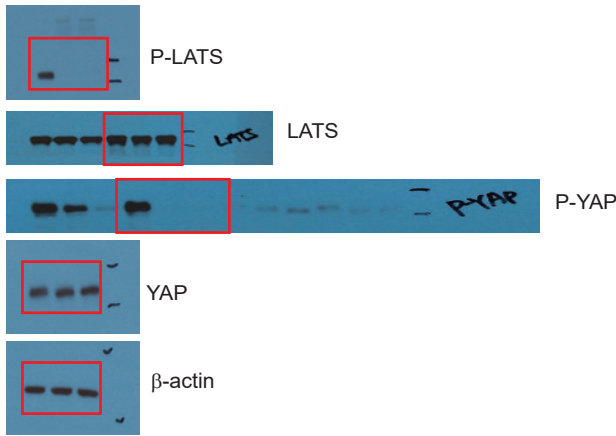

Figure 3C

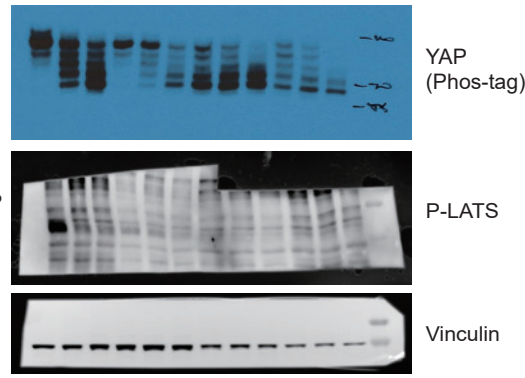

Figure 3D

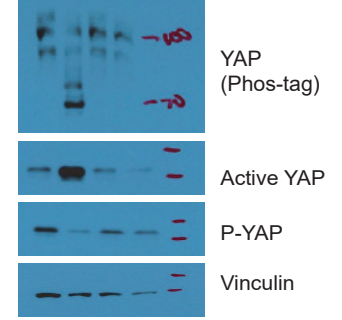

Figure 3G

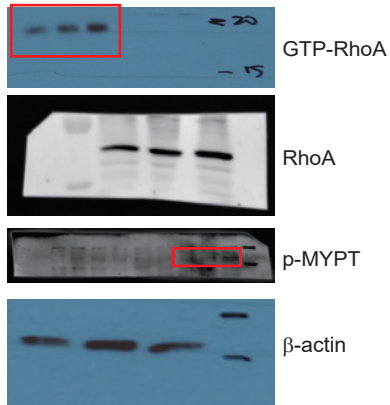

Figure 4A

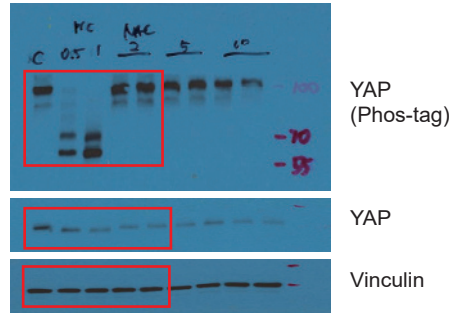

Figure 4B

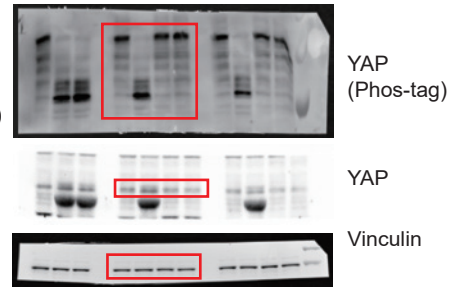

Figure 4F

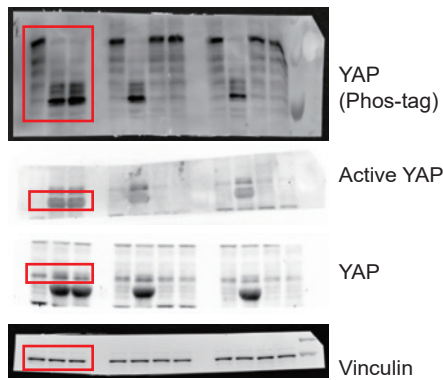

Figure 4H

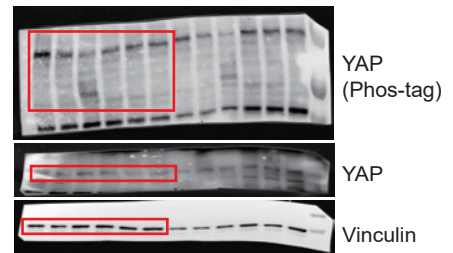

Figure 4C

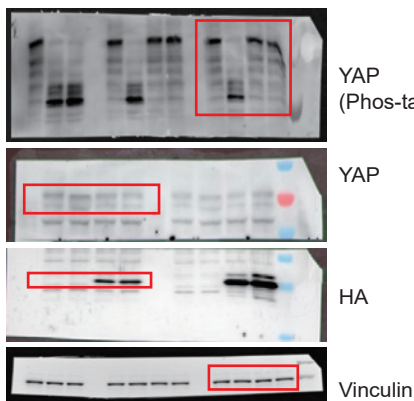

Figure 5A

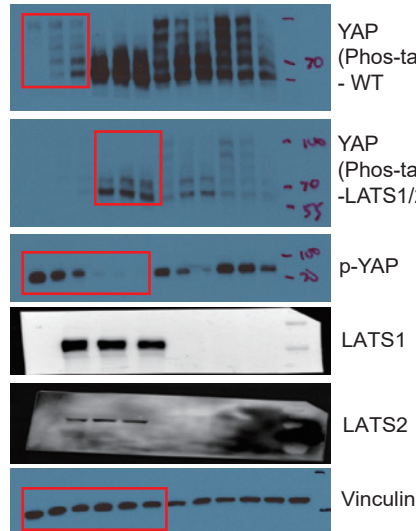

Figure 5B

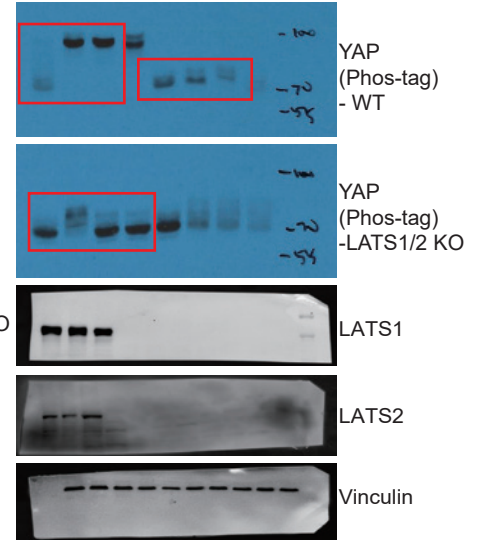

Figure 4K

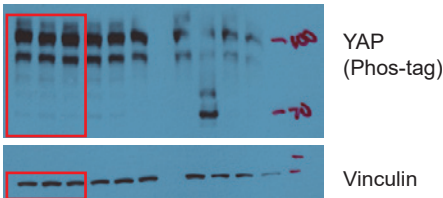

Figure 5C

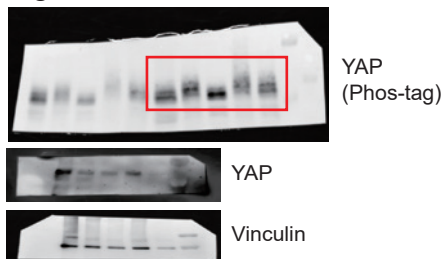

Figure 5D

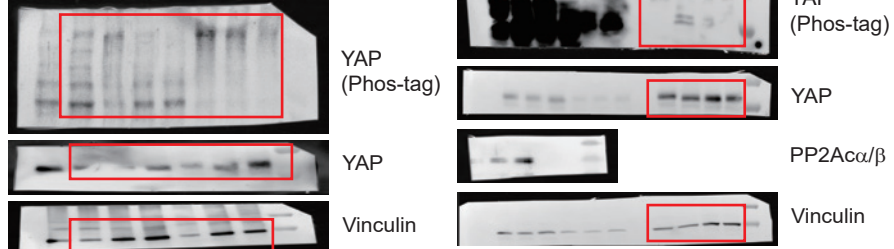

Figure 6A

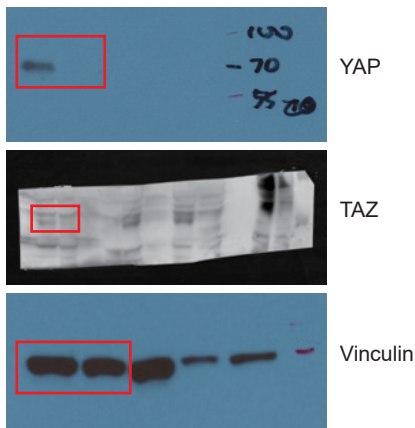

Figure 7B

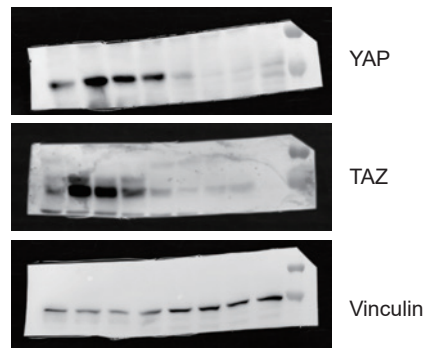

Supplementary Figure 2A

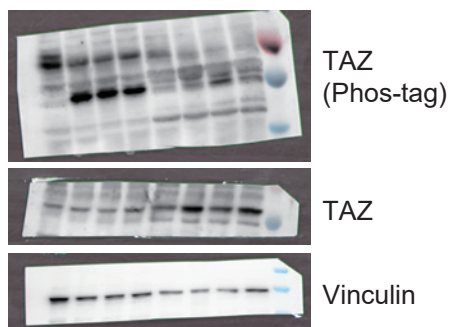

Supplementary Figure 2C

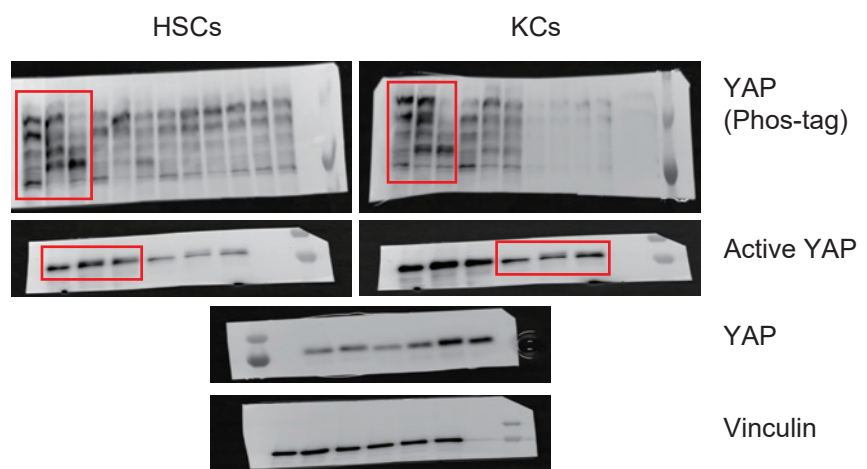

Supplementary Figure 2E

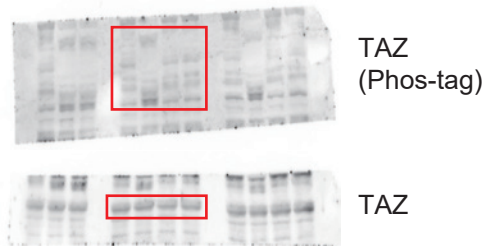

Supplementary Figure 2F

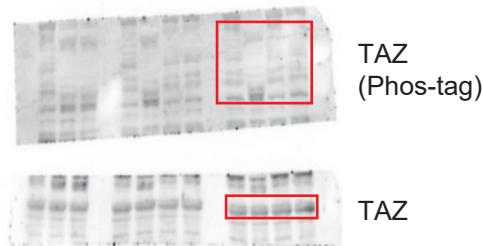

Supplementary Figure 2G

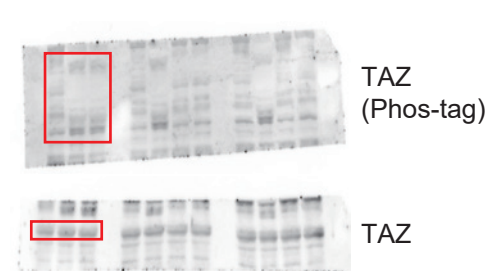

Supplementary Figure 3B

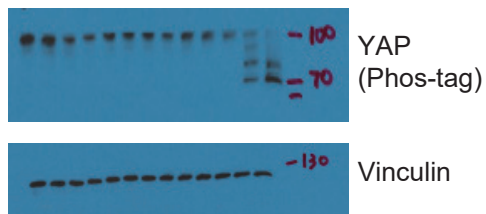

Supplementary Figure 4A

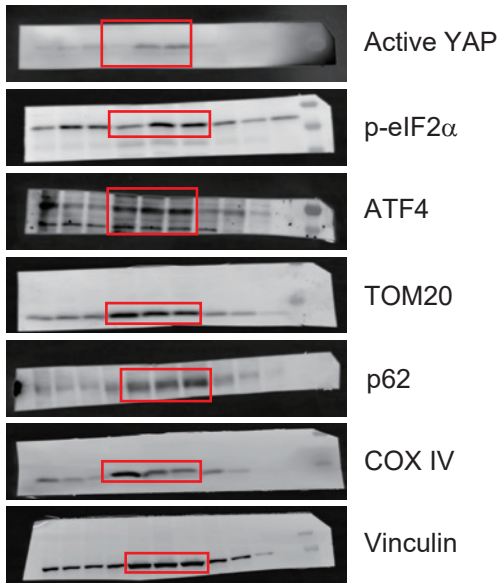

Supplementary Figure 4C

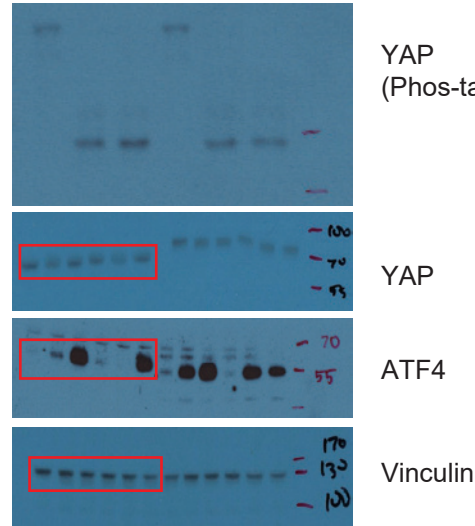

Supplementary Figure 4D

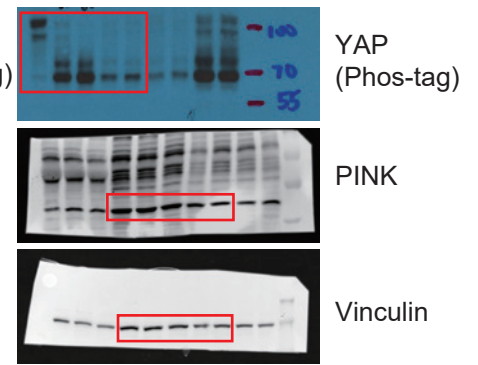

Supplementary Figure 4B

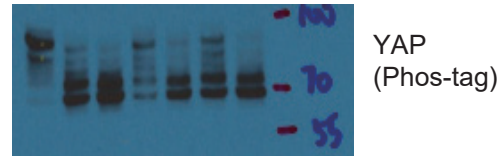

Supplementary Figure 4E

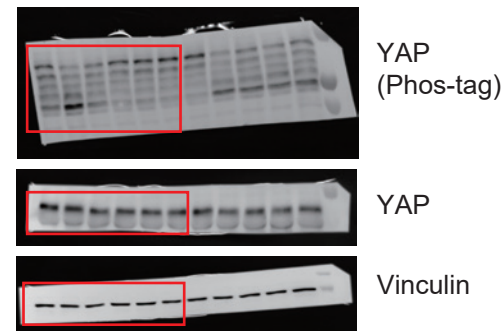

Supplementary Figure 4F

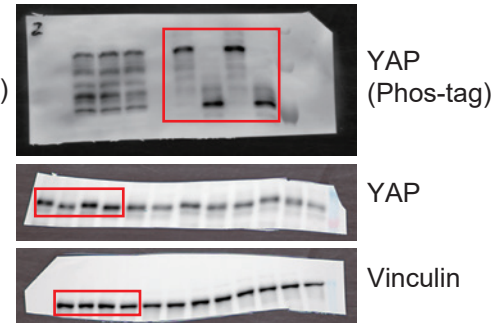

Supplementary Figure 5

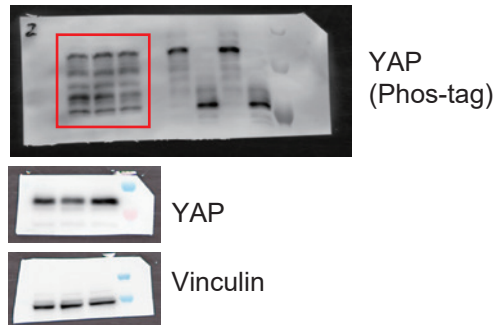

Supplementary Figure 6D

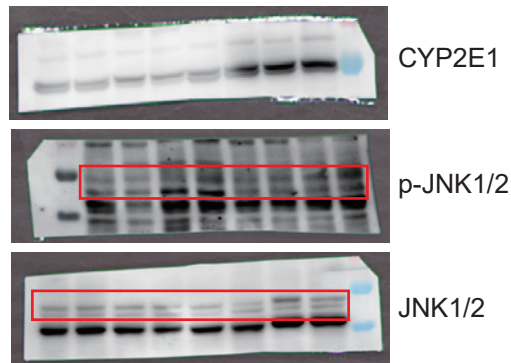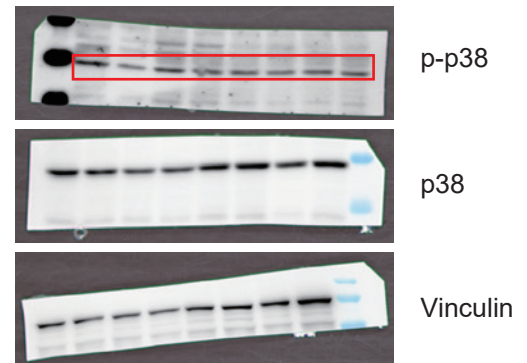

Supplement: 41419_2024_6448_MOESM8_ESM.pdf [file 41419_2024_6448_MOESM8_ESM.pdf]
